# Supplementary material
Source: HighWire-hosted journal article supplement (https://www.cmaj.ca/highwire/filestream/59233/field_highwire_adjunct_files/0/186_7.pdf)
Supplement: 186_7.pdf [file 186_7.pdf]

## ÉDITORIAL

## Mettre fin à la cyberintimidation nécessite un effort de société concerté

Matthew B. Stanbrook MD PhD

Pour la version anglaise de l'éditorial, veuillez consulter la page 483.

L'Internet et les médias sociaux ont transformé le visage de l'intimidation. La cyberintimidation est devenue une menace omniprésente pour la santé et le bien-être — parfois même la vie — des jeunes. Le gouvernement fédéral a proposé une nouvelle loi pour lutter contre la cyberintimidation<sup>1</sup>, qu'il espère faire adopter ce printemps. Bien que le Code criminel couvre de nombreuses activités qui constituent des formes graves d'intimidation, la nouvelle loi interdirait explicitement la distribution d'« images intimes » d'une personne sans son consentement. Elle donnerait aussi aux tribunaux le pouvoir de saisir les appareils électroniques utilisés pour commettre des infractions présumées de cyberintimidation.

Cette nouvelle loi, qui est accueillie favorablement, apportera un complément aux initiatives provinciales visant à accroître le pouvoir des autorités policières pour lutter contre les formes les plus graves de cyberintimidation. Il ne suffira pas, cependant, d'adopter des lois pour lutter avec succès contre l'incidence croissante de ce fléau : il faudra un effort concerté de tous les secteurs de la société.

La forme la plus courante de cyberintimidation prend la forme de messages menaçants ou agressifs ou de commentaires haineux transmis par courriels ou messages textes (textos) ou affichés sur des sites de réseautage social<sup>2</sup>. Elle peut également inclure l'usurpation en ligne de l'identité d'une autre personne ou la diffusion non consensuelle de renseignements personnels ou d'images intimes. Si l'intimidation était autrefois limitée à la cour d'école, la cyberintimidation peut suivre ses victimes partout où ils vont et en tout temps. La popularité fulgurante de la connectivité sociale facilitée par Internet peut donner lieu à une hausse similaire de la cyberintimidation et de son impact : les railleries, les menaces ainsi que la diffusion de renseignements personnels gênants et d'images intimes peuvent désormais facilement se propager instantanément, à l'échelle planétaire et de manière permanente. Et la cyberintimidation peut être plus cruelle du fait qu'elle se produit dans un anonymat menaçant qui n'est pas atténué par l'empathie que pourraient ressentir les intimidateurs s'ils avaient à regarder leurs victimes dans les yeux.

Même si la cyberintimidation est loin de viser uniquement les jeunes, il reste que la plupart de ses victimes et des cyberintimidateurs sont des adolescents et de jeunes adultes. Selon de récents sondages réalisés au Canada, 1 élève du secondaire sur 3 a subi une forme ou une autre d'intimidation, et un peu moins de 1 élève sur 10 a déclaré avoir été victime de cyberintimidation<sup>2</sup>. D'autres pays ont rapporté une incidence beaucoup plus

élevée<sup>3</sup>. Autant pour les victimes que les auteurs, la cyberintimidation a été associée à la dépression, à une faible estime de soi, à des troubles de comportement et à la toxicomanie, problèmes qui persistent souvent à l'âge adulte<sup>4</sup>. La cyberintimidation est également liée à un risque accru de suicide, peut-être plus élevé chez les filles<sup>4</sup>, et ce constat a attiré l'attention publique lors de cas tragiques très médiatisés tels que le suicide de deux adolescentes canadiennes, Rehtaeh Parsons et Amanda Todd.

Tout comme le visage de l'intimidation a changé, les stratégies que nous utilisons pour la combattre doivent aussi évoluer. La loi en donne un exemple important. La loi proposée par le gouvernement fédéral couvre beaucoup plus que la cyberintimidation. Certains ont accusé le gouvernement de réintroduire des mesures réduisant la protection des renseignements personnels dans un projet de loi antérieur qu'il a abandonné en raison d'importantes protestations publiques<sup>5</sup>. Ces préoccupations sont valables, mais il ne faut pas perdre une occasion de contrer la cyberintimidation.

Quoi qu'il en soit, de nouvelles lois pénales et civiles ne suffiront pas à contrer les formes moins graves mais beaucoup plus courantes de cyberintimidation et à réduire leur impact sur le bien-être des jeunes. Les professionnels de la santé, à qui les jeunes peuvent être plus disposés à se confier qu'à des enseignants ou à leurs parents, ont un rôle important à jouer pour déterminer s'il y a ou non cyberintimidation. L'apparition de nouveaux problèmes de comportement ou de santé mentale ou de symptômes psychosomatiques, ou la baisse de la performance scolaire devraient susciter un questionnement sur l'intimidation, y compris la cyberintimidation. Une fois qu'une situation d'intimidation est été repérée, le clinicien doit chercher à dépister les séquelles associées à la cyberintimidation, y compris la dépression et les tendances suicidaires, et utiliser les ressources appropriées pour contrer à la fois l'intimidation et ses conséquences.

Les écoles doivent continuer à jouer un rôle central et actif dans la lutte contre toutes les formes d'intimidation, par l'éducation, la prévention, la surveillance et l'imposition de mesures disciplinaires. Les nouvelles lois contre l'intimidation adoptées en Alberta, au Manitoba, en Ontario et au Québec ont mis l'accent sur le renforcement des rôles et responsabilités des écoles. Les parents doivent aussi être vigilants et surveiller les activités en ligne et sociales de leurs enfants. Ils doivent reconnaître rapidement les changements de comportement découlant de ces activités et agir promptement. L'Internet et les entreprises de médias sociaux dont les plates-formes permettent la cyberintimidation

doivent jouer un rôle plus actif pour contrer ce fléau. De plus, les médias doivent être prudents et responsables dans leur couverture de suicides liés à la cyberintimidation, compte tenu des préoccupations liées à l'effet de « contagion » du suicide.

Quelle que soit la forme qu'elle prend, l'intimidation est malsaine pour les victimes, les intimidateurs et la société. La modernisation de nos lois en vue d'y intégrer explicitement la cyberintimidation est une étape positive d'amélioration de la santé, et la profession médicale devrait l'appuyer.

## Références

1. Projet de loi C-13, Loi modifiant le Code criminel, la Loi sur la preuve au Canada, la Loi sur la concurrence et la Loi sur l'entraide juridique en matière criminelle; 2<sup>e</sup> session, 41<sup>e</sup> législature. Accessible ici : [www.parl.gc.ca/HousePublications/Publication.aspx?Language=E&Mode=1&DocId=6311444&File=4](http://www.parl.gc.ca/HousePublications/Publication.aspx?Language=E&Mode=1&DocId=6311444&File=4) (consulté le 27 février 2014).

2. Groupe de travail du Comité de coordination des hauts fonctionnaires sur le cybercrime. Rapport aux ministres fédéraux/provinciaux/territoriaux responsables de la Justice et de la Sécurité publique. Cyberintimidation et distribution non consensuelle d'images intimes. Ottawa (Ont.) : ministre de la Justice et procureur général du Canada; 2013. Accessible ici : [www.justice.gc.ca/fra/pr-rp/autre-other/cdncii-cndii/pdf/cdncii-cndii-fra.pdf](http://www.justice.gc.ca/fra/pr-rp/autre-other/cdncii-cndii/pdf/cdncii-cndii-fra.pdf) (consulté le 27 février 2014).
3. Kiriakidis SP, Kavoura A. Cyberbullying: a review of the literature on harassment through the internet and other electronic means. *Fam Community Health* 2010;33: 82-93.
4. Cooper GD, Clements PT, Holt KE. Examining childhood bullying and adolescent suicide: implications for school nurses. *J Sch Nurs* 2012;28:275-83.
5. Mayer A. New cyberbullying law has "larger agenda," expands police powers. CBC News, le 21 novembre 2013. Accessible ici : [www.cbc.ca/news/canada/new-cyberbullying-law-has-larger-agenda-expands-police-powers-1.2434797](http://www.cbc.ca/news/canada/new-cyberbullying-law-has-larger-agenda-expands-police-powers-1.2434797) (consulté le 27 février 2014).

**Intérêts concurrents :** Se rendre à [www.cmaj.ca/site/misc/cmaj\\_staff.xhtml](http://www.cmaj.ca/site/misc/cmaj_staff.xhtml)

**Affiliation :** Matthew Stanbrook est rédacteur adjoint du JAMC

**Correspondance à :** Éditeur du JAMC, [pubs@cmaj.ca](mailto:pubs@cmaj.ca)

## RÉSUMÉS DE RECHERCHE

# Prévalence et facteurs de risque de la douleur non angineuse postopératoire persistante après une intervention chirurgicale cardiaque : étude multicentrique prospective de 2 ans

Manon Choinière PhD, Judy Watt-Watson PhD, J. Charles Victor PhD, Roger J.F. Baskett MD, Jean S. Bussièrès MD, Michel Carrier MD, Jennifer Cogan MD MSc, Judy Costello MSc, Christopher Feindel MD, Marie-Claude Guertin PhD, Mélanie Racine PhD, Marie-Christine Taillefer PhD

Pour la version anglaise de ce résumé, veuillez consulter la page 505.

### Intérêts concurrents :

Aucun déclaré.

Cet article a été revu par les pairs.

### Correspondance à :

Manon Choinière,  
[manon.choiniere@umontreal.ca](mailto:manon.choiniere@umontreal.ca)

**Contexte :** La douleur postopératoire persistante demeure une complication insuffisamment reconnue. Nous avons examiné la prévalence et les facteurs de risque de ce type de douleur après une intervention chirurgicale cardiaque.

**Méthodes :** Nous avons inscrit des patients qui ont subi un pontage aortocoronarien ou un remplacement valvulaire, ou les deux, du 8 février 2005 au 1<sup>er</sup> septembre 2009. Nous avons utilisé des mesures validées pour évaluer a) l'anxiété et la dépression préopératoires, la tendance à dramatiser la douleur, la qualité de vie liée à la santé et la présence d'une douleur persistante; b) l'intensité de la douleur et les perturbations causées par celle-ci au cours de la première semaine après l'intervention; et c) la présence et l'intensité d'une douleur postopératoire persistante 3, 6, 12 et 24 mois après l'intervention chirurgicale. La présence d'une douleur postopératoire persistante au cours du suivi de 24 mois a constitué le résultat principal.

**Résultats :** Au total, 1247 patients ont rempli le questionnaire préopératoire. Les taux de rétention au suivi à 3 et à 24 mois se sont établis à 84 % et 78 % respectivement. La prévalence d'une douleur postopératoire persistante a diminué considérablement avec le temps, pour tomber de

40,1 % à 3 mois à 22,1 % à 6 mois, 16,5 % à 12 mois et 9,5 % à 24 mois. La douleur a été jugée modérée à sévère chez 3,6 % des patients à 24 mois. La présence d'une douleur postopératoire aiguë constitue un prédicteur à la fois de la présence et de la gravité d'une douleur postopératoire persistante. Plus la douleur était intense et plus elle nuisait au fonctionnement au cours de la première semaine suivant l'intervention chirurgicale, plus les patients étaient susceptibles de signaler la présence d'une douleur postopératoire persistante. La présence d'une douleur persistante préexistante et l'anxiété préopératoire accrue ont aussi constitué des prédicteurs de présence d'une douleur postopératoire persistante.

**Interprétation :** La douleur postopératoire persistante d'origine non angineuse après une intervention chirurgicale cardiaque a eu un effet sur un pourcentage important de patients à l'étude. Il faudra effectuer des recherches à l'avenir pour déterminer si les interventions visant à modifier certains facteurs de risque, comme l'anxiété préopératoire et la gravité de la douleur avant et immédiatement après l'intervention chirurgicale, peuvent aider à réduire au minimum ou à prévenir la douleur postopératoire persistante.
